# Supplementary material for: Sinus heart rate post pulmonary vein ablation and long-term risk of recurrences
Source: Clin Res Cardiol. 2020 Nov 12;110(6):851–60. doi: 10.1007/s00392-020-01765-z (PMC8166690; doi:10.1007/s00392-020-01765-z)
Supplement: Supplementary file 1 — Supplementary file1 (PDF 22 KB) Figure 1 PRISMA flow diagram showing the selection process for all patients [file 392_2020_1765_MOESM1_ESM.pdf]

Karolinska catheter ablation registry

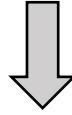

**1836 patients**  
with paroxysmal or persistent atrial fibrillation ablated between years 2012 – 2017  
assessed for eligibility

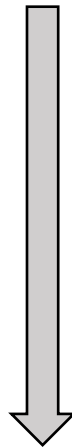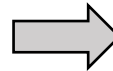

**Did not meet inclusion criteria**

**610 patients** – not first-time PVI procedure and / or additional ablation lines in left/right atrium and / or ablation of complex fractionated atrial electrograms

**239 patients** - cryo catheter ablation

**41 patients** – carrier of pacemaker or implantable cardioverter defibrillator

**18 patients** – major complications during catheter ablation

**29 patients** - other reasons

**899 patients**

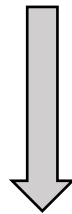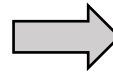

**Excluded during follow-up**

**225 patients** - insufficient follow-up data regarding recurrences

**180 patients** - atrial fibrillation in ECG measurement at PRE, POST or 3M

**9 patients** - ECG measurement not available at PRE or POST

**3 patients** – death during follow-Up

**482 patients**  
included in analysis
